# Supplementary material for: Parasite infection accelerates age polyethism in young honey bees
Source: PubMed Central journal article supplement (PMC4766577; doi:10.1038/srep22042), 2016-02-25
Supplement: srep22042-s1.pdf [file srep22042-s1.pdf]

1 **Parasite infection accelerates age polyethism in young honey bees**

2 **Antoine Lecocq<sup>1,2,\*</sup>, Annette Bruun Jensen<sup>2</sup>, Per Kryger<sup>3</sup>, and James C. Nieh<sup>1</sup>**

3

4 <sup>1</sup> Division of Biological Sciences, Section of Ecology, Behavior, and Evolution, University of  
5 California San Diego, 9500 Gilman Drive, MC 0116, La Jolla, California, 92093–0166,  
6 United States of America

7 <sup>2</sup> University of Copenhagen, Department of Plants and Environmental Sciences - PLEN,  
8 Thorvaldsensvej 40, 1871 Frederiksberg C, DK

9 <sup>3</sup> Aarhus University, Department of Agroecology - Entomology and Plant Pathology,  
10 Forsøgsvej 1, 4200 Slagelse, DK

11 \* Corresponding author

12 [antoine2@outlook.com](mailto:antoine2@outlook.com)

13

14

15

16

17

18

19

20

21

22

23

24

25

26  
27  
28  
29  
30  
31  
32  
33  
34  
35  
36  
37  
38  
39  
40  
41  
42  
43  
44  
45  
46  
47  
48  
49  
50

## Supplemental Information

### Supplemental Methods

In a preliminary experiment, we conducted a single trial with 108 bees (54 bees per cage, one cage for the *Nosema* treatment and one for the control treatment). Unlike subsequent trials, the combs used for these cages contained an approximately equal proportion of stored honey and brood, thus more closely approximating a colony. In addition, adult bees were not the same age, but rather were bees that were on the comb sections before they were cut out. They therefore contained bees of multiple ages that typically aggregate on the brood comb. These bees were initially placed into a common cage, removed for labeling, and randomly assigned to the control or *Nosema* cages.

We scored the same set of behaviors, except for QMP attraction. As in the other trials, we placed a QMP lure inside each cage, but attached to the cage door, not to the comb and thus not in view of the video camera. This preliminary trial therefore did not include an analysis of attraction to the QMP. Because we sometimes observed bees contacting the QMP lure, we decided to position the lure on the comb and score this behaviour in the subsequent full experiment. Behaviour was otherwise analyzed as described for the full experiment. We scored behaviors for 2 min each 4 hrs, but did so every two days. In the full experiment, we scored behaviors every day. We made other changes in the full experiment because (1) the brood did not survive to the end of the trial, (2) we were concerned about the potential for spores present in the comb wax, and (3) using adult bees of unknown ages is problematic. In the full experiment, we therefore used sterilized combs without brood or stored honey and bees that were all the same age.

These data were analyzed in the same way as the full data (see paper). A Bonferroni correction was not applied to analyses of this preliminary trial since this data was only analyzed once.

51

## 52 **Results & Discussion**

53           In this preliminary trial (Fig. S1a), as in the full experiment (see paper), trophallaxis  
54 was elevated in *Nosema*-treated as compared to control bees (treatment effect:  $F_{1,78}=9.78$ ,  
55  $P=0.003$ ). This increase in trophallaxis in the *Nosema*-treated bees matches the results of the  
56 full experiment (Fig. 3a). Likewise, there was an effect of time ( $F_{1,78}=5.11$ ,  $P=0.027$ ). The  
57 interaction treatment\*time was not significant ( $F_{1,78}=3.06$ ,  $P=0.08$ ). Unlike the full  
58 experiment, trophallaxis in *Nosema*-treated bees increased markedly at day 14, perhaps due to  
59 methodological differences. However, the overall trend of increased trophallaxis was the  
60 same.

61           In the preliminary trial (Fig. S1b), walking was also elevated in *Nosema*-treated as  
62 compared to control bees (treatment effect:  $F_{1,78}=4.06$ ,  $P=0.04$ ). Time and the interaction  
63 treatment\*time were not significant ( $F_{1,78}\leq 0.72$ ,  $P\geq 0.40$ ). In the full experiment, the walking  
64 increased towards the end of the 14-day trial, whereas the preliminary data showed a roughly  
65 consistent elevation over time. These differences may have arisen from the methodological  
66 differences, but the overall trend of increased walking was similar.

67

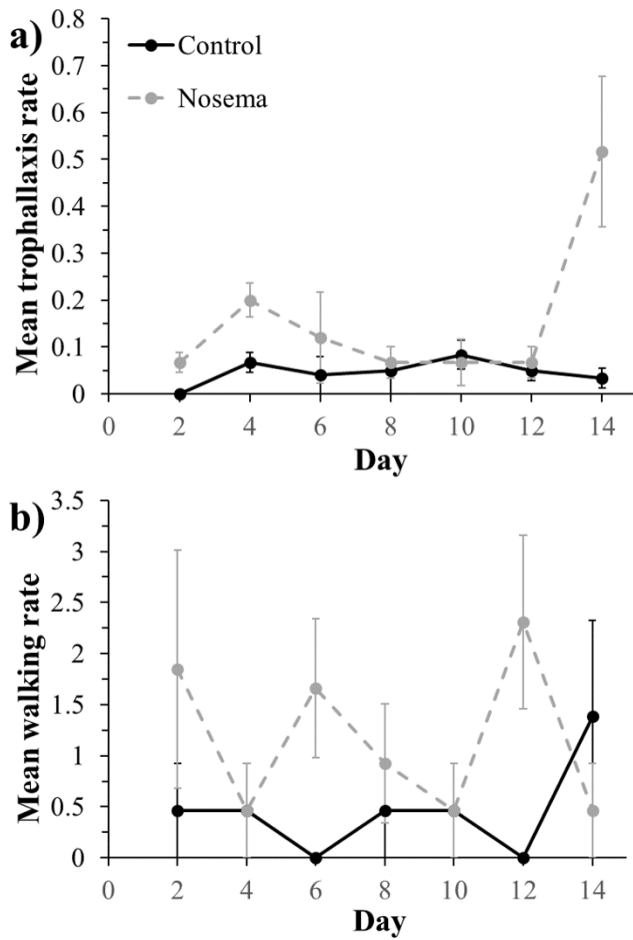

68

69 **Figure S1.** Effect of *Nosema* treatment in the preliminary experiment upon (a) the number of  
 70 trophallaxis and (b) walking events per bee. Standard error bars are shown.

71

## **Supplementary Data S1**

**Trial:** Which trial these bees were part of

**Treatment:** Either control group or Nosema group

**Colony:** Name of the colony used for a particular trial (different colony for each trial)

**BeeID:** Unique identifying name for each bee

**ID:** Original tag number of the bee in the group

**Spore count:** Amount of spores found in the bee by microscopic analysis

**Day of Death:** Day at which the bee died (if it died prior to the end of the trial)

**Alive at end of trial? (censoring):** 1= bee was still alive at the end; 2= bee died prior to the end

**Binary infection level:** Categorical variable linked to “Spore count”;  $\leq 30K$ = Bee with equal or less than 30,000 spores at the end of the trial;  $>30K$ = Bee with more than 30,000 spores at the end of the trial

## **Supplementary Data S2 and S3**

**Treatment:** Either control group or Nosema group

**Trial:** Which trial these bees were part of

**Colony:** Name of the colony used for a particular trial (different colony for each trial)

**Cage:** Specific i.d for each cage used in the trial. Combination of trial number and treatment

**Observer:** The name of the scientist responsible for the data analysis and behaviour recording

**Date:** Date during which the behaviours took place, for each trial

**Day:** Numerical value of the date, days run from 2 to 14

**Period:** Aggregated days into 3 periods linked to the development times of a *Nosema* sp. Infection; Period 1= days 2 to 5; Period 2= days 6 to 10; Period 3= days 11 to 14

**ID:** Original tag number of the bee in the group

**BeeID:** Unique identifying name for each bee

**Spore count:** Amount of spores found in the bee by microscopic analysis

**Ordinal infection level:** Categorical variable linked to “Spore count”; no spores= 0 spores;  $\leq 30K$ = Bee with equal or less than 30,000 spores at the end of the trial;  $>30K$ = Bee with more than 30,000 spores at the end of the trial

**Binary infection level:** Categorical variable linked to “Spore count”;  $\leq 30K$ = Bee with equal or less than 30,000 spores at the end of the trial;  $>30K$ = Bee with more than 30,000 spores at the end of the trial

**Spores?:** Did with see spores in the bee? No spores= no; spores= yes

**Standing; Walking; Trophallaxis; Antennating; Grooming self; Allo-grooming; Groom dance; Inspect cell; Fanning; Shake sign; Sugar visit; Pollen visit; Queen Attendance:** Please refer to table 1 for the descriptions of the observed behaviours. Behavioural rates are per day.

**LogStanding; LogWalking; LogTrophallaxis; LogAntennating; LogGrooming self; LogAllo-grooming; LogGroom dance; LogInspect cell; LogFanning; LogShake sign; LogSugar visit; LogPollen visit; LogQueen Attendance:** Log transformed data used for analysis and modelling.
